# Supplementary material for: Monitoring surfactant mediated defence of gastrointestinal Proteus mirabilis DMTMMK1 against pathogenic consortia of Vibrio cholerae
Source: Royal Society of Chemistry journal article supplement (doi:10.1039/c7ra01934c), 2017-01-01
Supplement: c7ra01934c1.pdf [file c7ra01934c1.pdf]

**Electronic Supplementary information for**  
**Monitoring surfactant mediated defence of gastrointestinal *Proteus mirabilis* DMTMMK1 against pathogenic**  
**consortia of *Vibrio cholerae***

**Suganya Kannan, Krithika Ashockkumar, Govindan Krishnamoorthy, Asha Dhasayan and**

**Murugan Marudhamuthu \***

<sup>1</sup>Department of Microbial Technology, School of Biological Sciences, Madurai Kamaraj University,

Madurai 625 021, Tamil Nadu, India

**Supporting Information Containing:**

**Number of pages: 5**

**Number of tables: 1**

**Number of figures: 3**

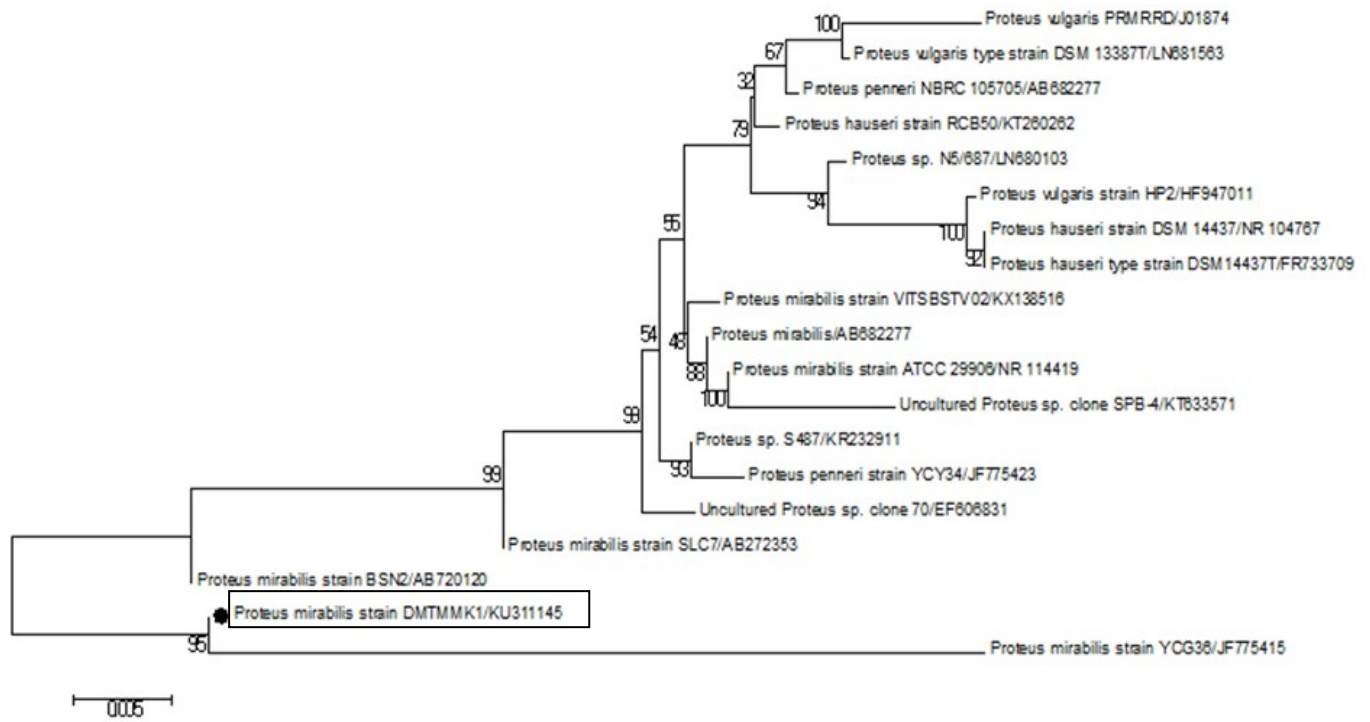

Fig. S1. Phylogenetic analysis of 16S rRNA from DMTMMK1

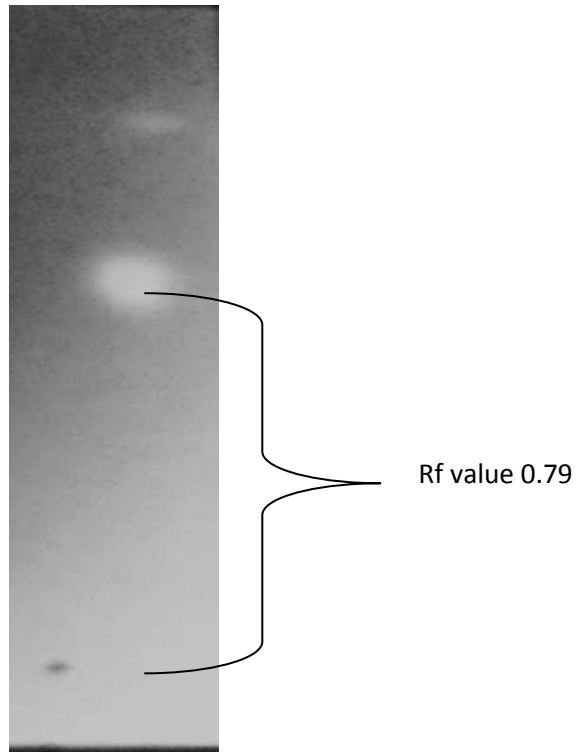

Fig. S2. Thin layer chromatography of biosurfactant on silica gel GF24 pre-coated plate.

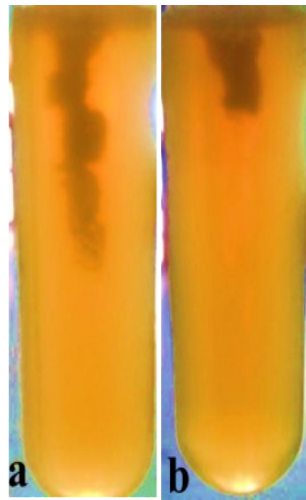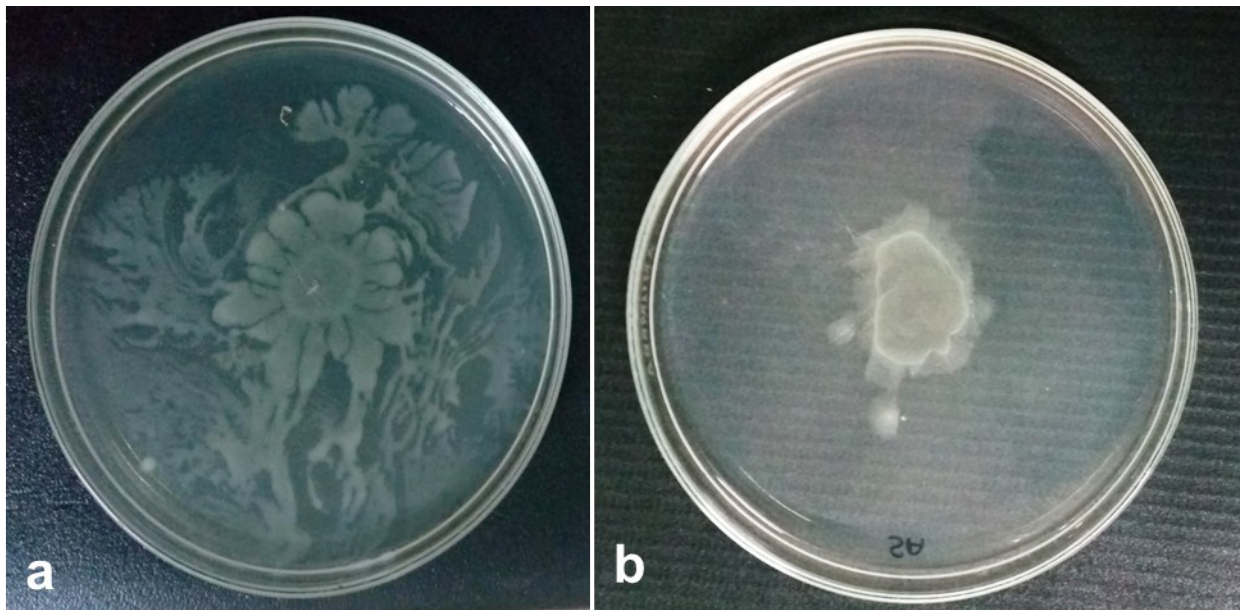

Fig .S3. Impaired motility of *Vibrio cholerae* a) Control untreated *Vibrio cholerae* cells b) *Vibrio cholerae* cells incubated with biosurfactant

| Phenotype                                                            | DMTMMK1  |
|----------------------------------------------------------------------|----------|
| Gram's character                                                     | Negative |
| Shape                                                                | Rods     |
| Growth on pH 3.0                                                     | +        |
| Growth on 0.3% bile                                                  | +        |
| Oxidase and catalase                                                 | - and +  |
| Utilization of glucose                                               | +        |
| Utilization of Lactose                                               | -        |
| MR and VP                                                            | +        |
| Production of enzymes                                                |          |
| Protease                                                             | -        |
| Lipase                                                               | +        |
| Amylase                                                              | -        |
| Urease                                                               | +        |
| Susceptibility to antibiotics ( $\mu\text{g}$ per disc)              |          |
| Ciprofloxacin, Chloramphenicol,<br>Ticarcillin, Amikasin, Bacitracin | S        |
| Ampicillin, Tetracyclin, Neomycin                                    | R        |
| Haemolysis of human RBC                                              |          |
| Cell associated                                                      | +        |
| Cell free                                                            | -        |

Table S1
